# Supplementary material for: Identification and functional analysis of endogenous nitric oxide in a filamentous fungus
Source: PubMed Central journal article supplement (PMC4948021; doi:10.1038/srep30037), 2016-07-18
Supplement: srep30037-s1.pdf [file srep30037-s1.pdf]

## Supplementary Information

### **Identification and functional analysis of endogenous nitric oxide in a filamentous fungus**

Anchalee Pengkit<sup>1</sup>, Seong Sil Jeon<sup>2</sup>, Soo Ji Son<sup>3</sup>, Jae Ho Shin<sup>3</sup>, Ku Yeon Baik<sup>1,2</sup>, Eun Ha Choi<sup>1,2</sup>,  
and Gyungsoon Park<sup>1,2\*</sup>

<sup>1</sup> Plasma Bioscience Research Center, Kwangwoon University, Seoul, 01897, Republic of Korea

<sup>2</sup> Department of Electrical and Biological Physics, Kwangwoon University, Seoul, 01897, Republic of Korea

<sup>3</sup> Department of Chemistry, Kwangwoon University, Seoul, 01897, Republic of Korea

\* To whom correspondence should be addressed. E-mail: [gyungp@kw.ac.kr](mailto:gyungp@kw.ac.kr)

## Methods

### **Analysis for responses of knockout mutants to exogenous nitric oxide (NO)**

Knockout mutants of transcription factors and serine/threonine protein kinases that are defective in vegetative hyphal growth and conidiation<sup>1,2</sup> (see supplementary table S1) were examined for responses to exogenous NO. Fungal spores were harvested from 2 weeks old culture tubes. Sterile water (5-6 ml) was added in culture tubes and tubes were vigorously shaken. The fungal suspension was filtered through 2 layers of miracloth and filtrated suspension was centrifuged at 5,000 rpm for 5 min. Spore pellet was resuspended in new sterile water. For examining vegetative hyphal growth, spore suspension (1  $\mu$ l;  $10^4$  spores) was inoculated on the center of VM agar plate on which 100  $\mu$ l of 0.2 mM SNP (sublethal dose to wild type) was spread. Then, plates were incubated at 30 °C in the dark for 24 h and diameter of radial hyphal growth was measured. For examining conidiation, spore suspension (1  $\mu$ l;  $10^4$  spores) was spread on the surface of VM liquid (2 ml) in tube and the tubes were incubated at 25 °C in the light. After 1 and 3 days, height of aerial hypha was measured. After 5 days, conidia were collected in 10 ml water and number was counted using hemacytometer. All measurements were performed in 3 replicates and significance of data difference between wild type and mutants was examined by Student's *t* test. Screening was repeated 4 times, and mutants showing recovery were selected in every screening.

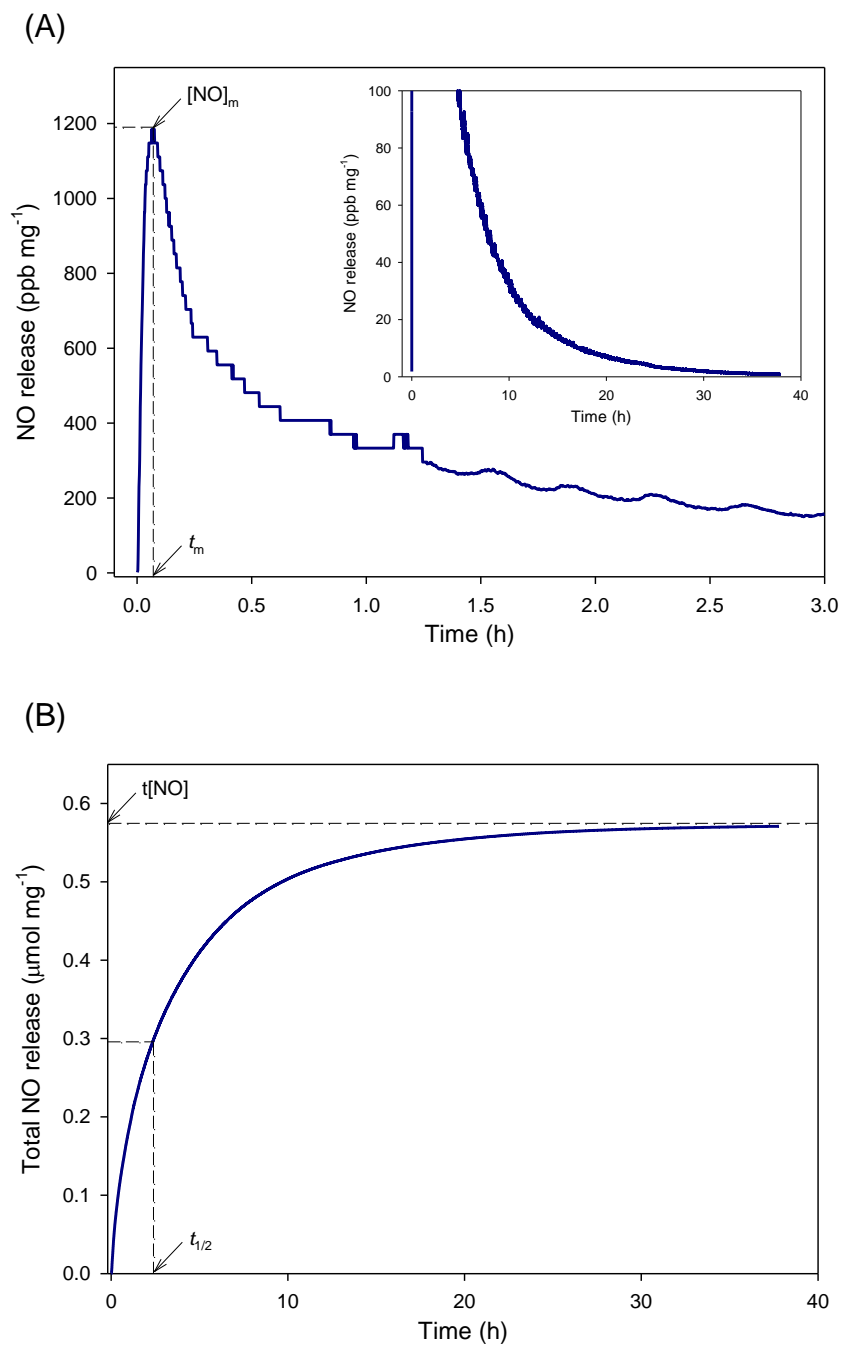

**Supplementary Figure S1.** Real-time NO release profiles (A) and total NO release amount (B) for 40 mol% *N*-diazoniumdiolated AEMP3 silica nanoparticles in deoxygenated PBS (0.1 M, pH 7.4) at 37°C. Inset plot represents the expansion of graph (A) at 100 ppb·mg<sup>-1</sup> NO release.

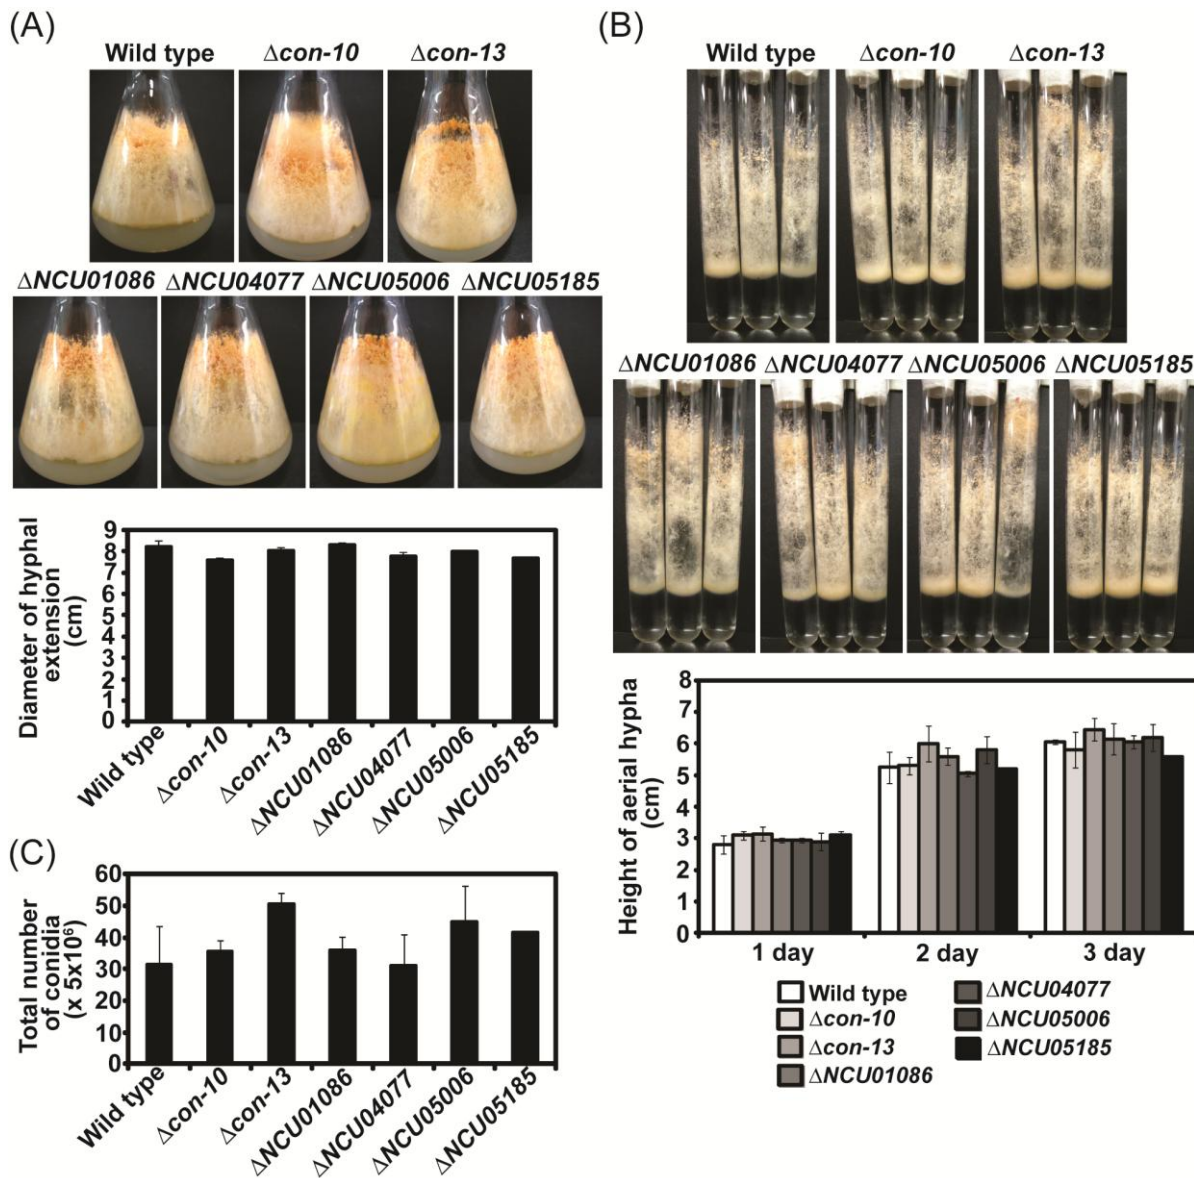

**Supplementary Figure S2.** Vegetative growth and asexual development of *Neurospora* mutants. (A) Wild type (ORS-SL6a) and knockout mutants grown in VM agar flask for 5 days (pictures), and basal hyphal extension on VM agar plate incubated for 24 h (graph). (B) Aerial hyphal growth of wild type and knockout mutants on the surface of VM liquid. Pictures were taken after incubation for 3 days. (C) Total number of conidia harvested after 5 days. Inoculation, harvest, and measurement were carried out following procedures described in Methods. All measurements were performed in 3 replicates.

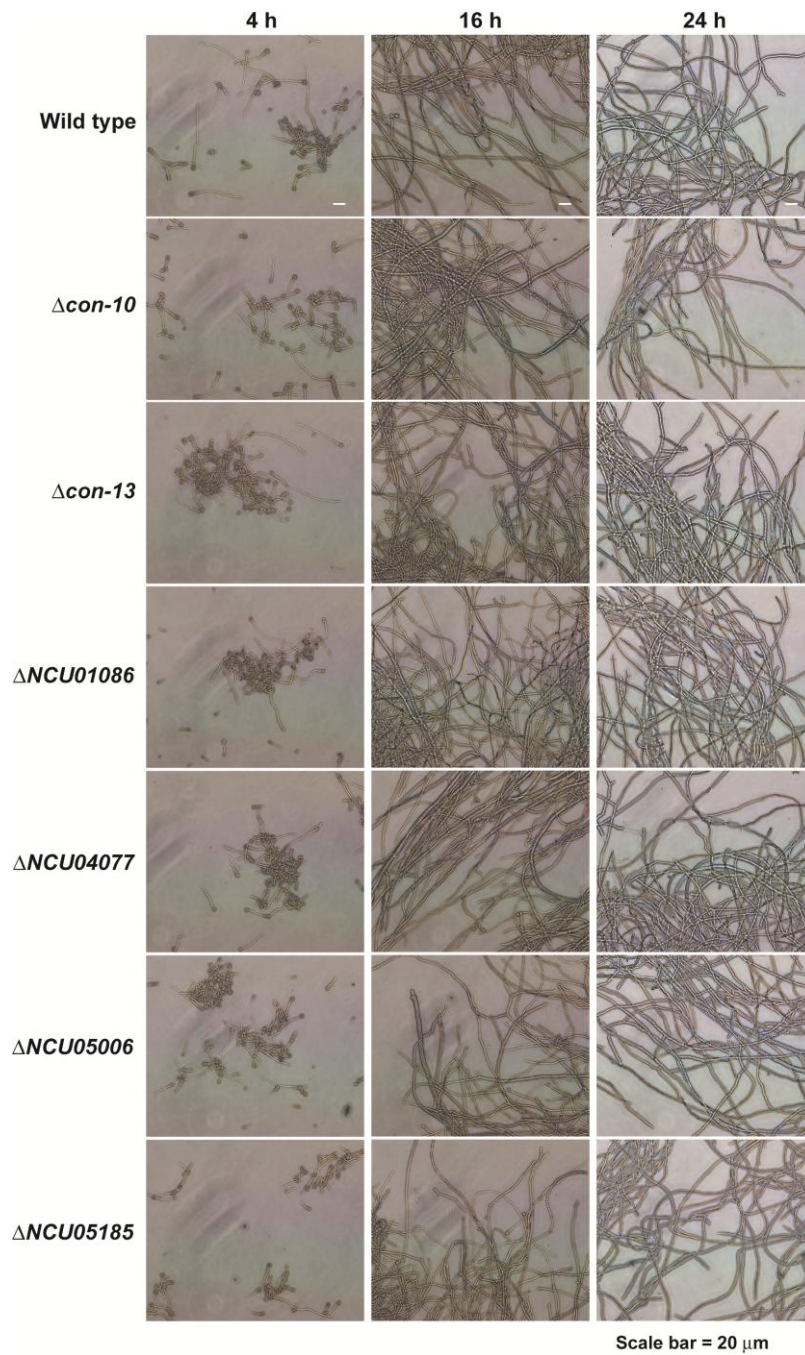

**Supplementary Figure S3.** Germination and hyphal development of wild type and knockout mutants in VM liquid.

(A)

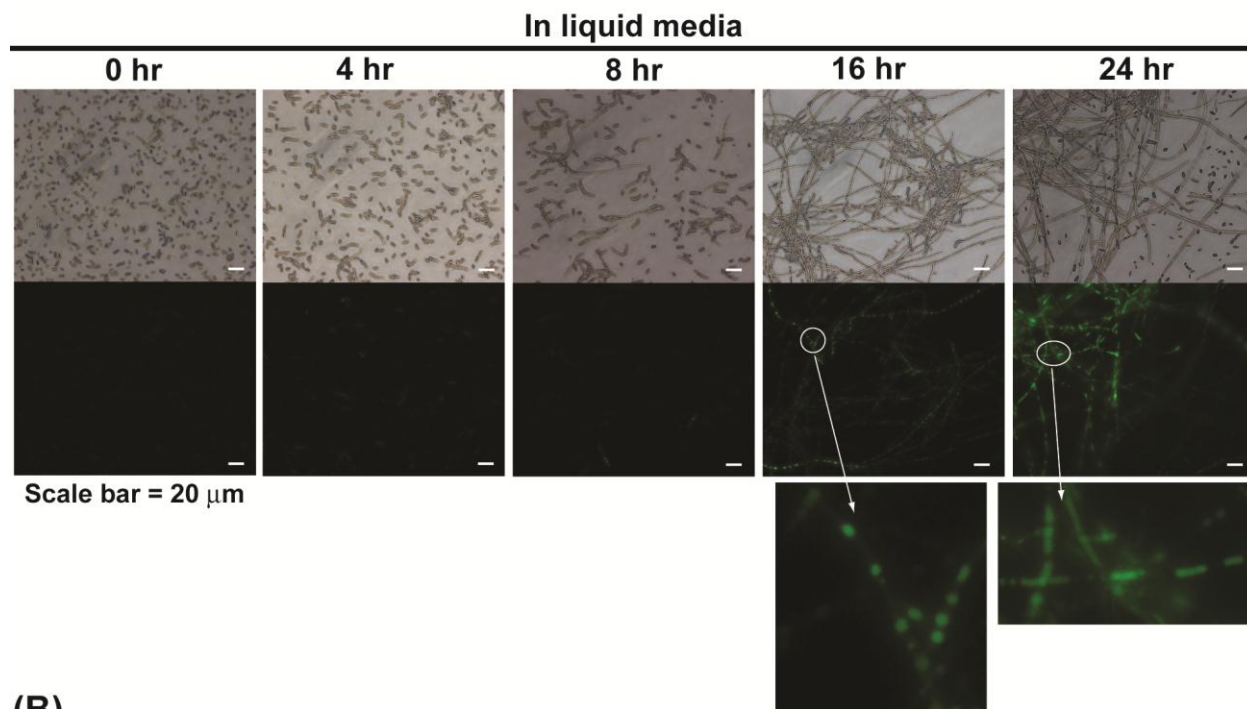

(B)

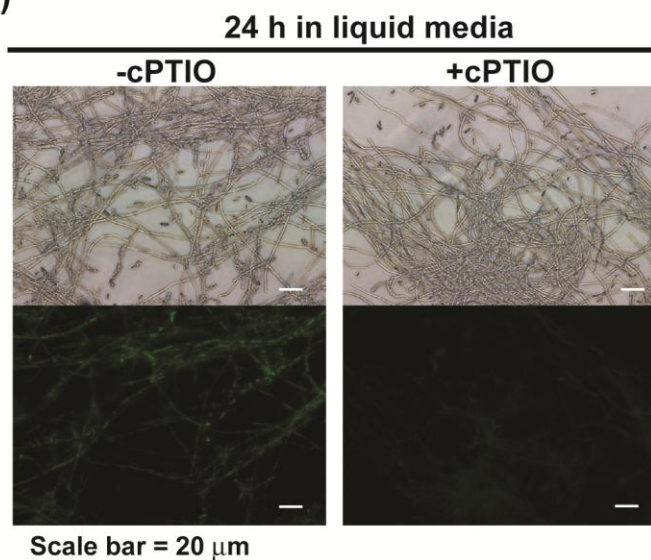

**Supplementary Figure S4.** (A) Intracellular NO detected in *Fusarium oxysporum f.sp. lycopersici* using DAF-FM diacetate during microconidia formation in VM liquid, (B) Intracellular NO detected in 24 h liquid culture with or without 50 mM cPTIO. Top and bottom of each picture indicate images captured in optical and fluorescent (465-495 nm excitation filter) mode, respectively. NO detection and treatment with cPTIO in *F. oxysporum* were performed as described in methods.

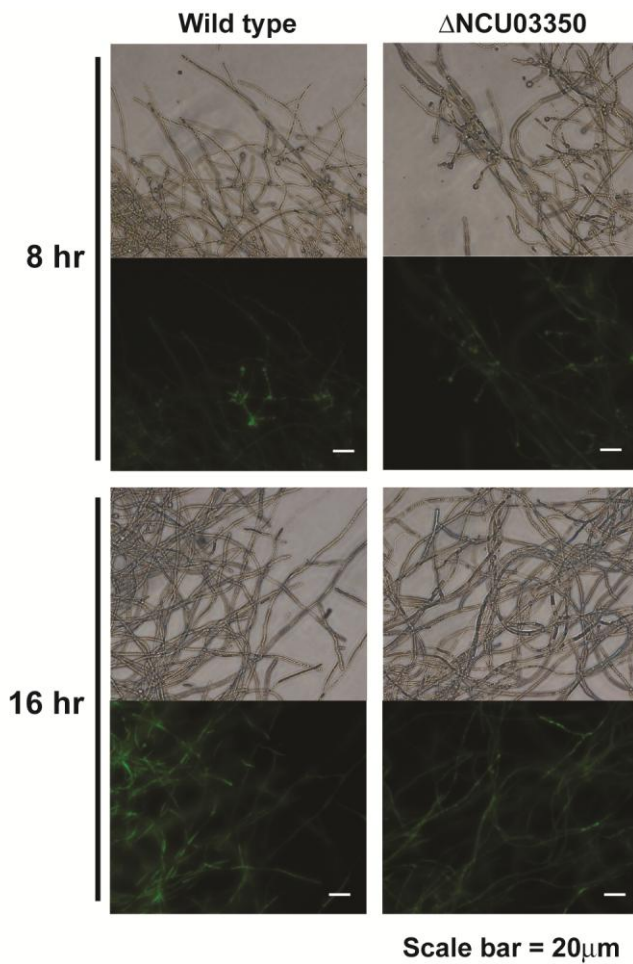

**Supplementary Figure S5.** Intracellular NO detected using DAF-FM diacetate in *N. crassa* wild type and knockout mutant of a putative xanthine oxidase gene (NCU03350) during vegetative growth in submerged VM culture. NO was detected after 8 and 16 h. Top and bottom of each picture indicate images captured in optical and fluorescent (465-495 nm excitation filter) mode, respectively.

**Supplementary Table S1. List of *N. crassa* knockout mutants used in the study**

| FGSC #          | Genotype       | FGSC #              | Genotype                     |
|-----------------|----------------|---------------------|------------------------------|
| TF <sup>1</sup> | NCU00289::hyg+ | Kinase <sup>2</sup> | NCU00188::hyg+               |
| TF              | NCU00329::hyg+ | Kinase              | NCU00406::hyg+               |
| TF              | NCU00499::hyg+ | Kinase              | NCU00587::hyg+, microconidia |
| TF              | NCU00902::hyg+ | Kinase              | NCU00914::hyg+               |
| TF              | NCU00945::hyg+ | Kinase              | NCU01187::hyg+, heterokaryon |
| TF              | NCU02017::hyg+ | Kinase              | NCU01498::hyg+               |
| TF              | NCU02094::hyg+ | Kinase              | NCU01797::hyg+               |
| TF              | NCU02214::hyg+ | Kinase              | NCU01940::hyg+               |
| TF              | NCU02896::hyg+ | Kinase              | NCU02234::hyg+               |
| TF              | NCU03320::hyg+ | Kinase              | NCU02393::hyg+               |
| TF              | NCU03489::hyg+ | Kinase              | NCU03071::hyg+               |
| TF              | NCU03593::hyg+ | Kinase              | NCU03124::hyg+               |
| TF              | NCU03686::hyg+ | Kinase              | NCU03200::hyg+               |
| TF              | NCU03931::hyg+ | Kinase              | NCU03523::hyg+               |
| TF              | NCU04179::hyg+ | Kinase              | NCU03571::hyg+               |
| TF              | NCU04390::hyg+ | Kinase              | NCU03894::hyg+               |
| TF              | NCU04731::hyg+ | Kinase              | NCU04096::hyg+               |
| TF              | NCU04866::hyg+ | Kinase              | NCU04426::hyg+               |
| TF              | NCU05051::hyg+ | Kinase              | NCU04612::hyg+               |
| TF              | NCU05383::hyg+ | Kinase              | NCU04747::hyg+               |
| TF              | NCU06068::hyg+ | Kinase              | NCU04990::hyg+               |
| TF              | NCU06407::hyg+ | Kinase              | NCU05655::hyg+               |
| TF              | NCU06411::hyg+ | Kinase              | NCU05658::hyg+               |
| TF              | NCU06656::hyg+ | Kinase              | NCU06182::hyg+               |
| TF              | NCU06799::hyg+ | Kinase              | NCU06202::hyg+               |
| TF              | NCU07139::hyg+ | Kinase              | NCU06240::hyg+               |
| TF              | NCU07392::hyg+ | Kinase              | NCU06638::hyg+               |
| TF              | NCU07535::hyg+ | Kinase              | NCU06685::hyg+               |
| TF              | NCU07788::hyg+ | Kinase              | NCU07024::hyg+               |
| TF              | NCU07945::hyg+ | Kinase              | NCU07296::hyg+               |
| TF              | NCU08294::hyg+ | Kinase              | NCU07378::hyg+               |
| TF              | NCU08651::hyg+ | Kinase              | NCU07399::hyg+               |
| TF              | NCU08726::hyg+ | Kinase              | NCU07872::hyg+               |
| TF              | NCU09205::hyg+ | Kinase              | NCU09071::hyg+               |
| TF              | NCU09739::hyg+ | Kinase              | NCU09123::hyg+               |

1, Transcription Factor

2, Serine/Threonine Protein Kinase



**Supplementary Table S2. Conidiation of knockout mutant *ΔNCU05658* after treatment with SNP**

| Height of aerial hypha (cm) |             |           |              |                  |           |              |
|-----------------------------|-------------|-----------|--------------|------------------|-----------|--------------|
|                             | Wild type   |           |              | <i>ΔNCU05658</i> |           |              |
|                             | without SNP | with SNP  | % SNP *      | without SNP      | with SNP  | % SNP        |
| 1 day                       | 1.3 ± 0.3   | 1.0 ± 0.1 | 80.0 ± 17.6  | 0.6 ± 0.1        | 0.7 ± 0.0 | 118.9 ± 20.1 |
| 3 days                      | 1.8 ± 0.3   | 1.9 ± 0.0 | 109.1 ± 16.1 | 0.9 ± 0.1        | 1.0 ± 0.2 | 114.5 ± 4.8  |

  

| Number of spores (x 10 <sup>6</sup> / ml) |              |             |            |                  |            |              |
|-------------------------------------------|--------------|-------------|------------|------------------|------------|--------------|
|                                           | Wild type    |             |            | <i>ΔNCU05658</i> |            |              |
|                                           | without SNP  | with SNP    | % SNP      | without SNP      | with SNP   | % SNP        |
| 5 days                                    | 104.3 ± 19.7 | 98.0 ± 16.0 | 94.4 ± 8.6 | 37.3 ± 14.4      | 44.3 ± 8.5 | 129.6 ± 45.3 |

\* % SNP = (value of with SNP / value of without SNP) x 100

## References

1. Colot, H. V. *et al.* A high-throughput gene knockout procedure for *Neurospora* reveals functions for multiple transcription factors. *Proc. Natl. Acad. Sci. U S A* **103**, 10352-10357 (2006).
2. Park, G. *et al.* Global analysis of serine-threonine protein kinase genes in *Neurospora crassa*. *Eukaryot. Cell* **10**, 1553-1564 (2011).
